1        **Natural selection towards wild-type in composite**  
2                                    **cross populations of winter wheat**

3 Samuel Knapp<sup>1,2</sup>, Thomas F. Döring<sup>3,4</sup>, Hannah E. Jones<sup>5</sup>, John Snape<sup>1</sup>, Luzie U. Wingen<sup>1</sup>, Martin  
4 S. Wolfe<sup>3</sup>, Michelle Leverington-Waite<sup>1</sup>, Simon Griffiths<sup>1\*</sup>

5 <sup>1</sup>John Innes Centre, Norwich Research Park, Norwich, NR4 7UH, UK

6 <sup>2</sup>Chair of Plant Nutrition, Technical University of Munich, 85354 Freising, Germany

7 <sup>3</sup>The Organic Research Centre, Hamstead Marshall, RG20 0HR, UK

8 <sup>4</sup>Agroecology and Organic Farming Group, University of Bonn, 53121 Bonn, Germany

9 <sup>5</sup>The School of Agriculture, Policy and Development, University of Reading, Reading, RG6 6AR,  
10 UK.

11 \*Corresponding author: [simon.griffiths@jic.ac.uk](mailto:simon.griffiths@jic.ac.uk), Phone number +44 (0)1603 450000

12

13 Abstract

14 Most of our crops are grown in monoculture with single genotypes grown over wide acreage. An  
15 alternative approach, where segregating populations are used as crops is an exciting possibility, but  
16 outcomes of natural selection upon this type of crop are not well understood. We tracked allelic  
17 frequency changes in evolving composite cross populations (CCPs) of wheat grown over ten  
18 generations under organic and conventional farming. At three generations, each population was  
19 genotyped with 19 SSR and 8 SNP markers. The latter were diagnostic for major functional genes.  
20 Gene diversity was constant at SSR markers but decreased over time for genic markers. Population  
21 differentiation between the four locations could not be detected, suggesting that organic vs. non-  
22 organic crop management did not drive allele frequency changes. However, we did see changes for  
23 genes controlling plant height and phenology in all populations independently and consistently. We  
24 interpret these changes as the result of a consistent natural selection towards wild-type. Independent  
25 selection for alleles that are associated with plant height suggests that competition for light was  
26 central, resulting in the predominance of stronger intraspecific competitors, and highlighting a  
27 potential trade-off between individual and population performance.

28

29 ***Keywords***

30 Cropping system, evolution, genetic diversity, natural selection, plant height

31

## 32 **Introduction**

33 Successful crop production depends on varieties that are well adapted to a target environment  
34 (Cooper and Hammer, 1996; Atlin et al., 2017) but sufficiently widely adapted so that breeding and  
35 seed production is economically viable. As a result, a large proportion of the harvested area is  
36 occupied by a few major inbreeding crops (e.g. wheat, barley, rice) and within any one farm, large  
37 blocks of each crop comprise single genotypes. This bears risks of vulnerability to diseases (Brown  
38 and Hovmøller, 2002) and limited adaptability to local conditions (Mercer and Perales, 2010).

39 A potential response to these drawbacks is the use of genetically diverse populations instead of  
40 clonal crops (Litrico and Violle, 2015). Crop populations can be created by mixing different  
41 varieties (Finckh and Wolfe, 2006) or by inter-crossing varieties and mixing the progenies  
42 (Suneson, 1956), which, in combination with harvesting and re-sowing each generation, is called  
43 evolutionary plant breeding (Suneson, 1956; Döring et al., 2011). Genotypes better adapted to local  
44 conditions should have more progeny and thus increase in frequency and over time could result in  
45 better locally adapted genotypes and increased grain yield (Döring et al., 2011).

46 Early wheat studies describe yield increases and with reported rates of genetic gain comparable to  
47 those mainstream breeding (Suneson, 1956). Similar results were reported by Allard (1988) and for  
48 biotic stress, Le Boulc'h et al. (1994) found increased resistance to powdery mildew as did Paillard  
49 et al. (2000). Furthermore, it was found that diverse winter wheat populations across France  
50 showed a differentiation in phenological development (Rhoné et al., 2010). Populations grown over  
51 several generations in Northern France with colder winters flowered later than populations grown in  
52 Southern France with risk of drought at the end of the growing season. Recently, Bertholdsson et al.  
53 (2016) showed that seedling traits of winter wheat CCPs were differentially selected in organic vs.  
54 conventional management systems, with the populations maintained under organic management  
55 showing an increase in seedling root length and root weight, while populations under conventional  
56 management showed no such increase. This suggests that the selection CCPs are subjected to can  
57 lead to adaptation to locally prevailing conditions and management systems.

58

59 These positive results were achieved in spite of the trade-off between individual plant fitness and  
60 population performance (Weiner et al., 2010; Denison, 2012; Anten and Vermeulen, 2016). Natural  
61 selection acts on individuals but population performance is the central variable in crop production.  
62 Individual fitness in a population strongly depends on competition-related traits such as plant  
63 height, but investment by individual plants in competition may reduce their potential for grain yield

64 (Weiner et al., 2010). Accordingly, harvest index in cereals, i.e. the proportion of grain yield in total  
65 biomass, decreases with increasing intra-specific completion among crop plants with increasing  
66 density (Weiner and Freckleton, 2010). However, under no-herbicide conditions of organic farming,  
67 where weeds are often more abundant than in conventional cropping systems (Gabriel et al., 2013),  
68 the same competition-related traits may be of advantage.

69 Our main objective was to find out whether selection can lead to genetic differentiation reflecting  
70 adaptation to different management conditions, and if the signature of this selection can be detected  
71 for a set of genes with particular importance for competition. To relate the function of selected  
72 alleles to these genetic signatures, we also evaluated allelic effects on plant height, heading date,  
73 yield and yield components in pure stands and on individual plants in the CCPs. We conducted this  
74 investigation on CCPs of winter wheat grown with minimal artificial selection for 10 generations in  
75 four locations, two organically and two conventionally managed sites, in Southern England.

76

## 77 **Material and Methods**

### 78 *Creation of populations and description of locations*

79 The CCPs were created by inter-crossing two sets of bread-wheat varieties: eight feed varieties and  
80 eleven milling varieties, plus the variety Bezostaya which was in both sets (Fig. 1 and Table S 1). F<sub>1</sub>  
81 plants were self-fertilized and the number of F<sub>2</sub> seeds from each cross counted and subsequently  
82 pooled. Seeds from 93 successful crosses (mean of 957 seeds per cross and range: 37 to 2569),  
83 entered the pooled founding population, subsequently termed FND. The pooled seeds were  
84 separated and sown by hand at each of the four locations in October 2003 in single plots (Fig. 1 and  
85 see also Döring et al., 2015). In subsequent generations, the populations were grown in a  
86 randomized complete block design (RCBD) with three replications with an average plot size of 25  
87 m<sup>2</sup> and a sowing density of 250 seeds/m<sup>2</sup>, giving an average demographic populations size of  
88 32,000 plants. The seeds from each population were harvested and a proportion was re-sown each  
89 year at each location without any artificial selection.

90

91 CCPs were grown at four locations: two organically managed: Wakelyns Agroforestry (WAF), in  
92 Suffolk (52° 39'N, 1° 17'E) and Sheepdrove Organic Farm (SOF) in Berkshire (51° 31'N, 1°  
93 30'W); and two conventionally managed: Metfield Hall Farm (MET), directly adjacent to WAF in  
94 Suffolk (52° 41'N, 1° 29'E) and Morley Research Station (MOR) in Norfolk (52° 56'N, 1° 10'E).  
95 Fertilizer, pesticide and growth regulator applications at MET and MOR followed commercial  
96 practice. No pesticides were applied at WAF and SOF. At the organic locations weeds were  
97 controlled mechanically and through rotational design. For detailed descriptions of climatic and soil  
98 conditions see Jones et al. (2010) and Döring et al. (2015).

### 99 *Sampling of plant material and phenotyping*

100 At SOF and WAF in generation 6 and 10, individual plants were tagged in the field, and plant  
101 height and heading date (day when ear is half-way emerged from flag leaf) were recorded.  
102 Individual plants were harvested, threshed, and grain yield of the whole plant was determined. From  
103 each plant, three random seeds were germinated and leaf tissue from one seedling was sampled for  
104 DNA extraction (final numbers of samples given in Fig. 1). At generation 3, from each location 150  
105 seeds and at generation 6 and 10, 500 seeds were sampled from pooled plot harvests for genotyping.  
106 Sampling at generation 6 was only conducted at MET and MOR. DNA was extracted from leaf

107 tissue (final sample number given in Fig. 1). As the genotype of the parental lines was crucial for  
108 the generation of the virtual FND (see below), DNA was extracted from five different seedlings per  
109 parental variety.

110 To evaluate the effect of the markers on pure stand performance, common plot trials with 19 of the  
111 total 20 parental varieties (except Norman) were assessed at the same four locations for plant  
112 height, obtained from 10 randomly chosen plants per plot, grain yield and yield components. These  
113 trials were conducted in three consecutive years (2005-2007) in a RCBD design with three  
114 replicates. For more detailed descriptions see Jones et al. (2010).

## 115 ***Genotyping***

116 After running a set of 70 publicly available SSR markers on the parental varieties and assessing the  
117 number of alleles and amplification quality, a subset of 18 SSR markers was chosen: 15 markers  
118 from Röder et al. (1998) (*gwm44*, *gwm46*, *gwm165*, *gwm186*, *gwm190*, *gwm213*, *gwm234*,  
119 *gwm325*, *gwm337*, *gwm469*, *gwm539*, *gwm583*, *gwm610* and *gwm626*, of which *gwm44* and  
120 *gwm165* produced two loci), two markers from Stephenson et al. (1998) (*psp3100* and *psp3103*)  
121 and each one marker from Edwards et al. (1996) (*wmc56*) and Somers et al. (2004) (*barc134*). As  
122 two markers produced two loci, all-in-all 20 SSR loci were used for the genotype analysis.

123 Additionally, eight SNP markers were included, which were shown to be diagnostic for major genes  
124 involved in plant height (*Rht-B1* and *Rht-D1*), vernalization requirement (*Vrn-A1*), photoperiod  
125 response (*Ppd-A1*, *Ppd-B1*, *Ppd-D1*, and *Ppd-D1(D2)*) and one marker linked to the *1B/1R*  
126 chromosome translocation from rye (Zeller et al., 1973). Information on the SNP markers can be  
127 found at [http://www.cerealsdb.uk.net/cerealgenomics/CerealsDB/kasp\\_download.php](http://www.cerealsdb.uk.net/cerealgenomics/CerealsDB/kasp_download.php).

## 128 ***Statistical analysis***

### 129 ***Creation of a virtual founding population (FND)***

130 As no seeds were kept from the original pooled founding population, the genotypic composition of  
131 this population could not be determined directly. Instead, we generated a virtual founding  
132 population by creating the heterozygous genotypes of each cross based on the genotype of the  
133 parentals. Subsequently we added the genotypes of each cross to the FND containing 10,000  
134 individuals, proportionally to the recorded number of seeds that went into the 'real' founding  
135 population (see above). The final number of the genotype from the cross of line i and line j in the

136 FND is thus  $n_{ij} = \frac{s_{ij}}{\sum s_{ij}} * 10000$ , where  $s_{ij}$  is the number of seeds from the cross of line i and line j,  
137  $\sum s_{ij}$  is the sum of seeds from all crosses, and  $n_{ij}$  was rounded to the nearest integer. We compared  
138 this approach to mixing parental genotypes proportionally ( $n_i = \frac{s_i}{\sum s_i} * 10000$ ), and to using the  
139 weight instead of the number of seeds ( $s_{ij}$  as the weight of seeds) of each cross that went into the  
140 real founding population. The former approach of mixing parental genotypes proportionally showed  
141 no difference in allele frequencies. The approach based on seed weights had a very small impact on  
142 the resulting allele frequencies with a mean absolute difference of 0.005. For this reason, we only  
143 show the results for allele frequencies in which the FND was calculated based on seed number.

#### 144 *Treatment of SSR markers*

145 At the SSR loci, alleles that were absent in parental genotypes (due to mutation or migration) were  
146 removed from the dataset, as the focus was on the assessment of allele frequencies. Mutations and  
147 migrations were considered as random and are thus assumed to have no biased effect on allele  
148 frequencies. To allow comparisons between the SSR and SNP marker sets and to avoid further  
149 assumptions in the mathematical treatment of multi-allelic markers (Goldringer and Bataillon, 2004;  
150 Meirmans and Hedrick, 2010), the marker data of the SSR markers were changed to bi-allelic  
151 markers. For each locus, the most frequent allele in the founding population was set as the first and  
152 all other alleles were combined into the second allele. The number of alleles and parental genotypes  
153 carrying the most frequent allele are shown in Table S 1.

#### 154 *Gene diversity*

155 As a measure of genetic diversity within populations, we estimated Nei's gene diversity ( $H_e$ ), which  
156 equals the expected heterozygosity under Hardy-Weinberg equilibrium (Nei, 1973). We calculated  
157  $H_e$  for each locus and subsequently averaged over loci. 95% confidence intervals (CIs) were  
158 generated by bootstrapping over loci with 5,000 bootstraps, thereby avoiding specific assumptions  
159 about the distribution of the estimated parameters. Gene diversity was calculated with the R-  
160 package *hierfstat* (Goudet, 2005).

#### 161 *Effective population size and genetic differentiation*

162 When testing the significance of changes in allele frequency due to selection it is important to test  
163 against changes due to genetic drift. Genetic drift is defined as the random change of allele  
164 frequencies resulting from the sampling of gametes over generations in a finite population (Hedrick,

165 2005). It can result in changes of allele frequency without any natural selection. The amount of  
166 genetic drift depends on the effective population size ( $N_e$ ), which is the number of fully outcrossing  
167 individuals in an ideal Wright-Fisher population undergoing the same rate of genetic change as the  
168 population under study (Wright, 1969). Note that  $N_e$  refers here to outcrossing individuals and does  
169 thus not refer directly to number of wheat plants.  $N_e$  can be derived by using neutral loci, which are  
170 assumed not to be subject to natural selection but only be affected by genetic drift. Subsequently,  
171 the expected amount of genetic drift can be calculated from the derived  $N_e$ . Loci that have  
172 undergone positive or diversifying selection should then show increased, or respectively decreased,  
173 levels of change in allele frequency (Goldringer and Bataillon, 2004).

174 Genetic differentiation can also result from pure genetic drift. We therefore used the genetic  
175 differentiation of neutral loci at generation 10 to estimate  $N_e$ . To remove loci under balancing or  
176 differential selection we employed the relation of expected genetic differentiation to heterozygosity  
177 (Beaumont and Nichols, 1996; Excoffier et al., 2009a). In particular, we used the function to detect  
178 loci under selection in the *Arlequin* package (Excoffier et al., 2009b), which simulates the expected  
179  $F_{ST}$  null distribution under genetic drift in a finite island model, dependent on the expected  
180 heterozygosity. We ran 20,000 simulations with 100 demes. The remaining loci are thus assumed to  
181 be neutral regarding differential selection. For the calculation of  $N_e$  from observed  $F_{ST}$ , we  
182 modified the equation from Hedrick (2005 p. 502), as  $F_{ST}$  is sampled from pairs of populations (see  
183 Supporting Method M2). Genetic differentiation between subpopulations with each size  $N_e$  after  $t$   
184 generations of genetic drift without any migration between subpopulation is thus

185 
$$F_{ST} = 1 - e^{-t/4N_e}.$$

186 To estimate  $N_e$  from observed  $F_{ST}$ , the equation needs to be solved for  $N_e$ :

187 
$$N_e = t / (4 \ln \left( -\frac{1}{F_{ST}-1} \right)).$$

188  $F_{ST}$  was estimated by Weir and Cockerham's  $F_{ST}$  (Weir and Cockerham, 1984) as implemented in  
189 *hierfstat*, which is based on an analysis of molecular variance (AMOVA) comparing between  
190 population to within population diversity. As an error estimate for  $N_e$  we produced 95% confidence  
191 intervals (CI) for  $F_{ST}$  with the *boot.vc* function in the *hierfstat* package as suggested by Weir and  
192 Cockerham (1984), and subsequently calculated the CIs for  $N_e$ . As we used the  $F_{ST}$  estimate from  
193 generation 10, and the populations were separated to the different locations in generation 2 (see Fig.  
194 1), we used  $t = 8$  as the number of generations since the populations could differentiate through  
195 genetic drift.



196 In order to compare the observed changes in allele frequency to the expected changes under pure  
197 genetic drift we calculated the 95% CIs of the allele frequency for each locus after  $t$  generations of  
198 genetic drift (Waples, 1989) as

$$199 \quad 95\% \text{ CI} = p_{FND} \pm 1.96 * \sqrt{p_{FND} * (1 - p_{FND}) * [1 - \left(1 - \frac{1}{2N_e}\right)^t]},$$

200 where  $p_{FND}$  is the allele frequency of the frequent allele in FND and  $N_e$  the effective  
201 population size. We furthermore compared this method to the temporal method as first proposed by  
202 Waples (1989), which is based on allele frequencies at two different generations (see Supporting  
203 Method M1).

#### 204 *Phenotypic effects*

205 To investigate the phenotypic effects of the selected alleles, we carried out an association analysis  
206 with two sets of data: (1) phenotypic assessments on single plants in mixed stands, i.e. within the  
207 diverse populations described so far, and (2) phenotypic assessments in pure stands of single  
208 genotypes. The latter reflects common crop stands of single genotypes and was assessed in standard  
209 plot field trials. Whereas in mixed stands every plant is surrounded by different genotypes, in pure  
210 stands the whole plot or field consists of one single genotype.

211 The effects of the marker loci in single plants in mixed stands were assessed on the tagged plants  
212 (see above) at SOF and WAF in generation 6 and 10, i.e. in four field trials in total. Data were  
213 analyzed with a mixed model for each marker locus separately:

$$214 \quad y_{ijk} = \mu + m_j + t_k + e_{ijk},$$

215 where  $y_{ijk}$  is the response of the  $i$ -th plant, carrying the  $j$ -th allele, in the  $k$ -th trial,  $\mu$  the grand  
216 mean,  $m_j$  the effect of the  $j$ -th allele,  $t_k$  the effect of the  $k$ -th trial, and  $e_{ijk}$  are the residuals. The  
217 effect of the trial and the residuals were considered as random. Only individuals being homozygous  
218 for the respective marker were included.

219 The effects of the marker loci in pure stands, i.e. from the CCPs' parent varieties, were assessed in  
220 common plot trials (3 years x 4 locations yielding overall 12 trials). First, adjusted means were  
221 calculated with the mixed model

$$222 \quad y_{jln} = \mu + (t_j r_n) + v_l + t_j + (v_l t_j) + e_{jln},$$

223 where  $y_{jln}$  is the response of the  $l$ -th variety in the  $n$ -th replicate block in the  $j$ -th trial,  $\mu$  the grand  
224 mean,  $(t_j r_n)$  is the effect of the  $n$ -th replicate block in the  $j$ -th trial,  $v_l$  is the effect of  $l$ -th variety,  $t_j$

225 is the effect of the  $i$ -th trial,  $(v_i t_j)$  the variety-trial interaction and  $e_{jln}$  are the residuals. All effects  
226 except the variety effect were taken as random. Subsequently, the marker effect was assessed on the  
227 adjusted means with the following fixed model, where again one model was run for each marker  
228 locus:

$$229 \quad y_{jl} = \mu + m_j + e_{jl},$$

230 where  $y_{lj}$  is the response of the  $l$ -th variety carrying the  $j$ -th allele,  $m_j$  the effect of the  $j$ -th allele  
231 and  $e_{jl}$  are the residuals.

232 Significance of the marker effects were tested by an F-test against the residuals. The direction and  
233 size of the additive allele effect of the frequent allele was calculated as half the difference of the  
234 adjusted means of individuals homozygous for the frequent allele minus the adjusted means of  
235 individuals homozygous for the rare allele.

236 To relate the additive allele effect to the direction of selection we performed Pearson correlation  
237 between the additive allele effect and the difference in allele frequency between FND and  
238 generation 10. Significance of the correlation was tested with a t-test.

239 The statistical analysis was performed in R, version 3.5.0 (R Core Team, 2018). Bootstrapping was  
240 performed with the *boot* package (Canty and Ripley, 2016), linear models were fit with the *lme4*  
241 package (Bates et al., 2014), adjusted means were extracted with the *emmeans* package (Lenth,  
242 2018), and ANOVA of the fixed effects was conducted with the *lmerTest* package (Kuznetsova et  
243 al., 2017).

244

## 245 **Results**

### 246 *Gene diversity*

247 All alleles that were present in the FND were also found in all sampled populations, so none of the  
248 alleles were eliminated over 10 generations. The two marker types show different levels of gene  
249 diversity (Fig. 2). However, as this measure depends on the allele frequencies the marker types  
250 cannot be directly compared. Diversity in the SSR set remained constant at 0.44, it decreased from  
251 0.28 to 0.20 in the SNP marker set (Fig. 2). Estimates within generations did not differ between  
252 locations, indicating that the populations underwent similar changes at the four different locations.

253

### 254 *Genetic differentiation*

255 To investigate if the populations underwent a differential selection at the four locations, we  
256 estimated Weir and Cockerham's  $F_{ST}$ .  $F_{ST}$  of zero indicates no differentiation and one represents  
257 fixation. The overall differentiation at generation 10 using all marker loci  $F_{ST}$  was 0.013 [0.008-  
258 0.018]. Pairwise estimates (

259 Table 1) range between  $F_{ST} = 0.006$  and  $F_{ST} = 0.018$ . Both organically managed locations show a  
260 lower estimate of  $F_{ST} = 0.006$  and a similarly small differentiation is found between SOF and MOR.  
261 To further test the differentiation due to management, we compared differentiation between both  
262 organically managed locations against both conventionally managed locations and compared this  
263 estimate to the pairwise groupings. The differentiation between management systems was higher  
264 (0.010 [0.005-0.015]) than both other groupings (WAF & MET vs. SOF & MOR: 0.005 [0.002-  
265 0.011] and SOF & MET vs. WAF & MOR: 0.005 [0.002-0.011]).  
266

267 Table 1. Pairwise genetic differentiation at generation 10, measured by Weir and Cockerham's  $F_{ST}$   
 268 (above diagonal) with 95% CIs from bootstrapping over loci (below diagonal). Metfield (MET) and  
 269 Morley (MOR) are conventionally managed; Sheepdrove Organic Farm (SOF) and Wakelyns  
 270 Agroforestry (WAF) are organically managed.

|              |     | conventional |             | organic     |       |
|--------------|-----|--------------|-------------|-------------|-------|
|              |     | MET          | MOR         | SOF         | WAF   |
| conventional | MET |              | 0.011       | 0.015       | 0.018 |
|              | MOR | 0.005-0.020  |             | 0.006       | 0.012 |
| organic      | SOF | 0.008-0.023  | 0.003-0.011 |             | 0.006 |
|              | WAF | 0.007-0.031  | 0.006-0.020 | 0.001-0.012 |       |

### 271 ***Effective Population Size***

272 Effective population size ( $N_e$ ) was estimated using the overall genetic differentiation in generation  
 273 10 and marker loci not under differential selection. These excluded three loci (*Ppd-B1*, *gwm165-4B*,  
 274 and *gwm46-7B*), which were identified to be under differential selection ( $P < 0.05$  and  $F_{ST}$  higher  
 275 than average, also see Figure S 1). Using the remaining loci, the overall genetic differentiation was  
 276 estimated as  $F_{ST} = 0.009$  [95% CI: 0.006-0.013], resulting in  $N_e = 221$  [153-332]. The temporal  
 277 method produced an estimate of  $N_e = 140$ , averaged across all comparisons for the SSR maker loci  
 278 (Table S 2). Here, we report only the estimate from the SSR markers, as the investigation on gene  
 279 diversity already indicates that selection took place in the SNP marker set, and absence of selection  
 280 is a prerequisite for the temporal method.

### 281 ***Changes in Allele Frequency***

282 Given two estimates for  $N_e$ , we inspected visually if the observed changes in allele frequency were  
 283 greater than expected under pure genetic drift for  $N_e = 150$  and  $N_e = 250$  (Fig. 3). Instead of using  
 284 only one final estimate, we used these two boundaries which allows comparisons of the size of  
 285 expected genetic drift under different  $N_e$ .

286 Overall, the observed changes of allele frequency could occur due to genetic drift alone, even for  
 287 the smaller  $N_e = 150$ . However, six of the gene-based markers (*Ppd-A1*, *Ppd-B1*, *Ppd-D1*, *Rht-B1*,  
 288 *Rht-D1*, and *1B.1R*) show consistent changes over generations which are greater than expected

289 under genetic drift. Except for *Ppd-B1*, the direction of selection was the same across locations and  
290 towards the wild type (WT) allele.

291 For *Ppd-B1* selection was only found at SOF and WAF. Furthermore, many SSR marker loci also  
292 showed similar selection for the same allele at all four locations (most notably *gwm165-4D*,  
293 *gwm186-5A*, *gwm539-2D*). The two loci which were identified to be under differential selection,  
294 *gwm165-4B*, and *gwm46-7B*, showed the greatest variation at generation 10, with selection at MET  
295 being different to the other locations. To test if selection was generally towards the similar direction  
296 at all four locations, we correlated the changes in allele frequency between FND and generation 10  
297 at the different locations. Table 2 shows that the changes were highly correlated ( $P < 0.001$ ) between  
298 the different locations. The strongest correlation ( $r = 0.82$ ) was between SOF and WAF, the two  
299 organically managed locations.

300

301 Table 2: Pearson correlation coefficients (above diagonal) of the difference of allele frequency  
302 between generation 10 at the different locations and the founding population (FND), with  
303 significance level indicated below the diagonal (\*\*\*:  $P < 0.001$ , based on a t-test with  $df = 26$ ) for the  
304 four different locations Metfield (MET), Morley (MOR), Sheepdrove Organic Farm (SOF) and  
305 Wakelyns Agroforestry (WAF).

|            | <b>MET</b> | <b>MOR</b> | <b>SOF</b> | <b>WAF</b> |
|------------|------------|------------|------------|------------|
| <b>MET</b> |            | 0.70       | 0.64       | 0.70       |
| <b>MOR</b> | ***        |            | 0.77       | 0.74       |
| <b>SOF</b> | ***        | ***        |            | 0.82       |
| <b>WAF</b> | ***        | ***        | ***        |            |

306

### 307 *Phenotypic effects of the selected alleles*

308 To investigate the phenotypic effects of the selected alleles, we correlated the changes of allele  
309 frequency with the additive allele effect in the mixed crop stands. Only plant height showed a  
310 significant correlation ( $P < 0.01$ ) to the overall changes of allele frequency between FND and  
311 generation 10 (Table 3 and Fig. 4). This relation indicates that height increasing alleles were under  
312 positive selection. This was true at both *Rht* homoeoloci. Interestingly, also *Ppd-A1* and *Ppd-D1*

313 showed a significant effect on plant height (see F-Test for marker trait associations in Table S 3)  
 314 again with the height increasing allele under positive selection (Fig. 4). Furthermore, at three SSR  
 315 marker loci (*gwm165-4D*, *gwm325-6D*, and *gwm539-2D*), where there was consistent selection for  
 316 the rare allele at all locations, the rare allele had a significant and increasing effect on plant height.

317

318 Table 3: Pearson correlations between the additive allele effects for the named traits measured in  
 319 single plants in mixed stands and the change in allele frequency from FND to the average allele  
 320 frequency at generation 10 (overall), and to the allele frequency at each location; \*, \*\* denote  
 321 significant correlation at P<0.05, and P<0.01, respectively.

| <b>Allele effect on trait</b>  | <b>Overall</b> | <b>MET</b> | <b>MOR</b> | <b>SOF</b> | <b>WAF</b> |
|--------------------------------|----------------|------------|------------|------------|------------|
| <b>Plant height</b>            | 0.56**         | 0.47*      | 0.68***    | 0.51**     | 0.36       |
| <b>Tillers per plant</b>       | 0.30           | 0.02       | 0.23       | 0.46*      | 0.38*      |
| <b>Grain number per tiller</b> | -0.10          | -0.09      | -0.04      | -0.07      | -0.14      |
| <b>Thousand grain weight</b>   | 0.23           | -0.02      | 0.24       | 0.42*      | 0.20       |
| <b>Grain weight per tiller</b> | 0.18           | <0.01      | 0.22       | 0.35       | 0.11       |
| <b>Harvest index</b>           | -0.35          | -0.22      | -0.36      | -0.40*     | -0.29      |
| <b>Heading date</b>            | 0.27           | 0.09       | 0.25       | 0.36       | 0.27       |

322

323 The relation between the additive allele effect on plant height and the change of allele frequency  
 324 was also significant (P<0.01) at each location except at WAF (Table 3). At both organic locations,  
 325 SOF and WAF, the change in allele frequency was significantly correlated with an increasing  
 326 additive effect of the selected alleles on the number of tillers per plant. However, it is difficult to  
 327 identify single markers, which are responsible for this significant correlation (Fig. 4**Error!**  
 328 **Reference source not found.**). Interestingly, at the locus *gwm610-4A*, which shows the strongest  
 329 effect on tillers per plant in single plants (Table S 3.), it has been selected – although not strongly –  
 330 for the allele with increasing additive allele effect on tillers per plant at both organic locations and  
 331 against this allele at both conventional locations (Fig. 3). Relationships between the additive allele  
 332 effects and yield components (grain number per tiller, thousand grain weight and grain weight per

333 tiller) were not significant neither were harvest index, and heading date were also not significant  
334 (Table 3).

335

336 Alleles often have pleiotropic effects, which can also result in the correlation between traits. As an  
337 example we calculated the correlations between plant height and various agronomically important  
338 traits. We compared these correlations among different traits for single plants in mixed stands  
339 compared to pure stands (



340 Table 4). Increased plant height was associated with decreased grain number per tiller in pure  
341 stands, while this effect was not significant in the mixed stand. Similarly, plant height was  
342 negatively associated with grain weight per tiller in pure stands, while in mixed stands the relation  
343 was reversed, though not significant. For all three yield components (tillers per plant, grain number  
344 per tiller and thousand grain weight), the correlation with plant height was smaller (i.e. more  
345 negative or less positive) for the pure stands than for the mixed stands. In the mixed stands, where  
346 different genotypes directly competed, plant height was needed more to generate yield than in the  
347 pure stands.

348 Further analysis showed that grain yield (the product of the three yield components) in pure stand  
349 was mostly dependent on grain number per tiller (data not shown). However, natural selection acted  
350 towards a decreased grain number per tiller (Table 3).

351

352

353 Table 4 Correlations between the allele effects on plant height and allele effects on various yield  
354 components and heading date, for single plants within mixed stand and for pure stands of single  
355 genotypes; (NA): data not available; \*, \*\* and \*\*\* denote significant correlations at P<0.05, P<0.01  
356 and P<0.001, respectively.

| <b>Allele effects on plant height</b> |                                                 |                                               |
|---------------------------------------|-------------------------------------------------|-----------------------------------------------|
| <b>Correlation with</b>               | <b>in single plants<br/>within mixed stands</b> | <b>in pure stands of<br/>single genotypes</b> |
| <b>Tillers per plant</b>              | 0.21                                            | -0.24                                         |
| <b>Grain number per tiller</b>        | -0.17                                           | -0.78***                                      |
| <b>Thousand grain weight</b>          | 0.37                                            | 0.23                                          |
| <b>Grain weight per tiller</b>        | 0.25                                            | -0.78***                                      |
| <b>Harvest index</b>                  | -0.78***                                        | -0.93***                                      |
| <b>Heading date</b>                   | 0.50**                                          | (NA)                                          |
| <b>Grain yield</b>                    | (NA)                                            | -0.70***                                      |

357

## 358 **Discussion**

### 359 *Gene diversity*

360 While gene diversity did not decrease at the SSR markers in all four independent populations, gene  
361 diversity decreased at the SNP markers, with equal magnitude in all populations (Fig. 2). The fact  
362 that gene diversity remained constant at the SSR markers indicates that little or no selection had  
363 taken place on loci tracked by these markers. In contrast, the decrease in gene diversity at the SNP  
364 markers suggests that selection on these functional markers did take place, and that selection,  
365 overall, was of similar magnitude and direction at all locations. As absolute values of  $H_e$  were  
366 dependent on the genetic composition, they cannot be directly compared to other studies where  
367 populations of different composition were used. However, Raggi et al. (2016) using 22 SSR  
368 markers also found no decrease in  $H_e$  in a CCP of barley that had evolved for 13 years. More  
369 generally, our results confirm that overall genetic diversity in evolving wheat populations appears to

370 be maintained to a large degree unless there is a strong specific selection force (e.g. Paillaird et al.  
371 (2000)).

### 372 *Effective population size*

373 Estimation of effective population size ( $N_e$ ) is crucial for the identification of loci changes in allele  
374 frequency greater than expected under pure drift. The method based on the genetic differentiation  
375 ( $F_{ST}$ ) produced a higher estimate than the temporal method, using only the SSR markers (220 vs  
376 140, Table S 2). The estimates from the temporal method based on the SNP markers showed an  
377 even smaller estimate (50, averaged over all comparisons), which is most likely due to selection  
378 taking place on these loci. As selection also took place on some of the SSR loci, the estimate from  
379 the temporal method also appears biased towards low estimates.

380 The values estimated in our study are higher than those reported by Rhoné et al.(2010) for different  
381 wheat populations grown over several generations in France, where estimates for  $N_e$  were 33, 114  
382 and 118 at three locations. Other estimates from wheat populations in France, with  $N_e = 311$  (Thépot  
383 et al., 2015) and  $N_e = 42$  to  $N_e = 208$  (Enjalbert et al., 1999) were closer to the values estimated here.

### 384 *Differentiation between locations*

385 One of our main aims was to evaluate whether genetic differentiation occurred over ten generations  
386 for wheat CCPs growing conditions in contrasting environments with very different management.  
387 To assess the strength of population differentiation we took values between 0 and 0.05 as a general  
388 convention for little differentiation (Wright, 1978; Hartl and Clark., 1997). According to this  
389 convention, the values observed in this study are very low, sometimes not even significantly  
390 different from zero. Even when investigating  $F_{ST}$  values for the single loci,  $F_{ST}$  values were still  
391 below 0.05 (data not shown).

392 Although the locations in our study differed in management (organic vs conventional), resulting in  
393 strong variation in average yield level (around 9.5 t/ha at the conventional locations, and 5.3 t/ha at  
394 the organic locations (Jones et al., 2010; Döring et al., 2015), no consistent genetic differentiation  
395 regarding the management practices could be detected. In fact, pairwise comparisons between sites  
396 showed low values for genetic differentiation (

397 Table 1), and selection was similar between locations, as indicated by the highly significant  
398 correlations between changes of allele frequencies (Table 2). In addition, markers diagnostic for  
399 genes of known function such as plant height and photoperiod sensitivity were not affected  
400 differently at the four studied locations (Fig. 3).

401 Three possible reasons for this lack of consistent genetic differentiation between the four locations  
402 are:

403 the number of generations was not sufficient to allow selection to exert a measurable effect on the  
404 genetic composition of the CCPs;

405 Some loci did exhibit environment specific selection but markers to detect these changes were not  
406 included in this study; Even though management is different between the locations, effective  
407 environmental conditions might be quite similar.

#### 408 ***Differentiation over time across all locations***

409 The more exciting outcome of our analysis was the detection of a clear selection signature for in  
410 terms of temporal differentiation. At all four locations, genetic changes were observed in the same  
411 direction, in particular for the alleles linked to increased plant height and later flowering time (Table  
412 3). These changes over time without any population differentiation can for most cases be  
413 summarized as selection towards wild-type. At the 5 loci for which significant changes of allele  
414 frequencies could be detected, there was selection for the wild-type alleles and against the mutant  
415 alleles that were introduced during the twentieth century through the implementation of systematic  
416 wheat breeding.

417 The two loci that have undergone the greatest change of allele frequencies were genes controlling  
418 height (*Rht-B1* and *Rht-D1*) (Fig. 3 and Fig. 4), suggesting that plant height has been a driving force  
419 in the evolutionary process of the investigated CCPs. This observation is supported by a study by  
420 Raquin et al. (2008), who found an increase of *Rht-B1* allele frequency in an experimental  
421 population of winter wheat from 0.66 in the initial generation to near-complete extinction of the  
422 dwarfing allele after 17 generations. The semi-dwarfing alleles at both loci were of major  
423 importance during the Green Revolution (Borlaug, 1983). Currently, 58 % of all European winter  
424 wheat varieties contain the *Rht-D1b* allele and 7% contain the *Rht-B1b* allele (Zanke et al., 2014).  
425 The selection for increased height can independently be observed in several other markers as well  
426 (Fig. 4, Table 3). These genetic effects confirm and explain the phenotypic observations on the  
427 same populations, which, in an earlier study, led to the conclusion that already in the third year of

428 development, the wheat CCPs were almost 10 cm taller than the mean of the parents (Döring et al.,  
429 2015).

430 The selection for increased height may mainly be explained by competition for light. At the  
431 population level, competition in a genetically diverse plant stand selects for taller intra-specific  
432 competitors. It is therefore expected that genotypes with increased height are selected over time,  
433 and this is confirmed by our study. However, competition for light may not be the only driver for  
434 selection against the so-called dwarfing genes. In particular, the dwarfing genes *Rht-B1b* and *Rht-*  
435 *D1b* confer effects of reduced early vigour through shorter coleoptiles, reduced vigour and in  
436 young plants. More generally, the selection observed in this study can be characterized as going  
437 towards more vegetative growth and more competitive ability, which could reduce yield  
438 potential (Denison, 2012).

439 The observed selection for increased height suggests that adaptation took place towards growing in  
440 a mixed stand population rather than to environmental conditions. This is because the dwarf  
441 genotypes, when grown together with taller neighbors will produce a reduced number of progenies,  
442 and thus be selected against over time. Thus, while the performance of a single plant in a mixed  
443 stand is determined by its competitive effect over its neighbours (e.g. through plant height), this is  
444 not the case in the pure stand.

445 The selection for the wild-type alleles at the genes *Ppd-B1L5* and *Ppd-D1* restores photoperiod  
446 sensitivity, as the mutant allele at both genes cause insensitivity to photoperiod (day length  
447 neutrality) and early heading. Again, these genes and alleles were very important for the Green  
448 Revolution (Borlaug, 1983), allowing very wide adaptation. Thus, also for the two *Ppd-I* genes,  
449 selection seems to have happened towards wild type and against alleles that are important in  
450 modern agricultural production. It should be noted also that the majority of UK wheat varieties are  
451 photoperiod sensitive so these results are also a reversion to UK type. Interestingly, the mutant allele  
452 of *Ppd1* is also responsible for a further shortening of plant height, due to the temporal shortening  
453 of vegetative growth (Börner et al., 1993). Accordingly, we observed a significant correlation  
454 between allele effects on plant height and heading date (

455 Table 4, Fig. 4). Because of the pleiotropic effects it is still open, what the driving factor for the  
456 changes in allele frequency of the *Ppd* genes were in the wheat CCPs. In particular, it remains open  
457 whether later flowering itself conveyed a fitness advantage to individuals within the evolving wheat  
458 populations.

459 The selection for the wild type form can also be hypothesized for the *X1B.1R* marker. This marker  
460 identifies the translocation from rye into wheat, which is widespread in many breeding programs,  
461 and mostly originates from the rye variety Petkus (Schneider and Molnár-Láng, 2009). In the  
462 studied populations, selection occurred against the translocation, even though it is assumed that the  
463 introgression confers increased disease resistance (Heslop-Harrison et al., 1990) and should thus  
464 also lead to improved fitness under disease pressure.

465 Our observation is that the major pattern of selection is the result of selection for wild-type alleles,  
466 it may be suggested that evolutionary plant breeding approaches can be improved by fixing these  
467 alleles, so that negative selection cannot occur. Consequently, individual plants within the diverse  
468 population would not invest resources on competition behaviour and selection would then be  
469 directed towards prevailing local growing conditions. However, traits that are linked to the  
470 competitive ability of the plant, such as plant height, are governed by a large number of genes  
471 (Zanke et al., 2014). It is therefore unlikely that competition within a population can be fixed  
472 genetically without substantially reducing genetic diversity. Since it seems impossible to create  
473 populations that are completely free of any trade-offs, future research will need to address the  
474 question which trade-offs show the greatest opportunities for developing multifunctional, and  
475 potentially adaptive, CCPs.

476

## 477 **Acknowledgements**

478 The work was funded under the LINK scheme with financial support from the UKs Department of  
479 Environment Food and Rural Affairs (Defra), the Biotechnology and Biological Sciences Research  
480 Council (BBSRC), and the Agriculture and Horticulture Development Board (AHDB). The project  
481 title was; Adaptive winter wheat populations: development, genetic characterization and application  
482 (LK0999).

## 483 **Author contributions**

484 SK performed data analysis and led writing of manuscript, TFD and HEJ conducted field  
485 experiments, MSW and JWS planned the experiments and won funding, LUW supported data  
486 analysis, MLW carried out molecular work, SG led project.

487

488

## 489 **References**

- 490 **Allard, R.W. 1988.** Genetic Changes Associated with the Evolution of Adaptedness in Cultivated  
491 Plants and Their Wild Progenitors. *J Hered* 79(4): 225–238.
- 492 **Anten, N.P.R., and P.J. Vermeulen. 2016.** Tragedies and Crops: Understanding Natural Selection  
493 To Improve Cropping Systems. *Trends in Ecology & Evolution* 31(6): 429–439. doi:  
494 10.1016/j.tree.2016.02.010.
- 495 **Atlin, G.N., J.E. Cairns, and B. Das. 2017.** Rapid breeding and varietal replacement are critical to  
496 adaptation of cropping systems in the developing world to climate change. *Global Food*  
497 *Security* 12: 31–37. doi: 10.1016/j.gfs.2017.01.008.
- 498 **Bates, D., M. Maechler, B. Bolker, and S. Walker. 2014.** lme4: Linear mixed-effects models  
499 using Eigen and S4. R package version 1.1-7. <http://CRAN.R-project.org/package=lme4>.
- 500 **Beaumont, M.A., and R.A. Nichols. 1996.** Evaluating loci for use in the genetic analysis of  
501 population structure. *Proc. R. Soc. Lond. B* 263(1377): 1619–1626. doi:  
502 10.1098/rspb.1996.0237.
- 503 **Bertholdsson, N.O., O. Weedon, S. Brumlop, and M.R. Finckh. 2016.** Evolutionary changes of  
504 weed competitive traits in winter wheat composite cross populations in organic and  
505 conventional farming systems. *European Journal of Agronomy* 79: 23–30. doi:  
506 10.1016/j.eja.2016.05.004.
- 507 **Borlaug, N.E. 1983.** Contributions of Conventional Plant Breeding to Food Production. *Science*  
508 219(4585): 689–693. doi: 10.1126/science.219.4585.689.
- 509 **Börner, A., A.J. Worland, J. Plaschke, E. Schumann, and C.N. Law. 1993.** Pleiotropic Effects  
510 of Genes for Reduced Height (Rht) and Day-Length Insensitivity (Ppd) on Yield and its  
511 Components for Wheat Grown in Middle Europe. *Plant Breeding* 111(3): 204–216. doi:  
512 10.1111/j.1439-0523.1993.tb00631.x.
- 513 **Brown, J.K.M., and M.S. Hovmøller. 2002.** Aerial Dispersal of Pathogens on the Global and  
514 Continental Scales and Its Impact on Plant Disease. *Science* 297(5581): 537–541. doi:  
515 10.1126/science.1072678.
- 516 **Canty, A., and B. Ripley. 2016.** boot: Bootstrap R (S-Plus) Functions. R package version 1.3-18.



- 517 **Cooper, M., and G.L. Hammer. 1996.** Synthesis of strategies for crop improvement. p. 591–623.  
518 *In* Cooper, M., Hammer, G.L. (eds.), *Plant Adaptation and Crop Improvement*. CAB  
519 International, Wallingford, UK.
- 520 **Denison, R.F. 2012.** Darwinian agriculture: How understanding evolution can improve agriculture.  
521 Princeton University Press.
- 522 **Döring, T.F., P. Annicchiarico, S. Clarke, Z. Haigh, H.E. Jones, H. Pearce, J. Snape, J. Zhan,**  
523 **and M.S. Wolfe. 2015.** Comparative analysis of performance and stability among  
524 composite cross populations, variety mixtures and pure lines of winter wheat in organic and  
525 conventional cropping systems. *Field Crops Research* 183: 235–245. doi:  
526 10.1016/j.fcr.2015.08.009.
- 527 **Döring, T.F., S. Knapp, G. Kovacs, K. Murphy, and M.S. Wolfe. 2011.** Evolutionary Plant  
528 Breeding in Cereals - Into a New Era. *Sustainability* 3(10): 1944–1971. doi:  
529 10.3390/su3101944.
- 530 **Edwards, K., J. Barker, A. Daly, C. Jones, and A. Karp. 1996.** Microsatellite libraries enriched  
531 for several microsatellite sequences in plants. *Biotechniques* 20(5): 758.
- 532 **Enjalbert, J., I. Goldringer, S. Paillard, and P. Brabant. 1999.** Molecular markers to study  
533 genetic drift and selection in wheat populations. *J Exp Bot* 50(332): 283–290. doi:  
534 10.1093/jxb/50.332.283.
- 535 **Excoffier, L., T. Hofer, and M. Foll. 2009a.** Detecting loci under selection in a hierarchically  
536 structured population. *Heredity* 103(4): 285–298. doi: 10.1038/hdy.2009.74.
- 537 **Excoffier, L., G. Laval, and S. Schneider. 2009b.** Arlequin: An Intergrated Software Package for  
538 Population Genetics Data Analysis, Version 3.5. Institute of Zoology, University of Berne,  
539 Berne, Switzerland.
- 540 **Finckh, M.R., and M.S. Wolfe. 2006.** Diversification strategies. p. 269–307. *In* Cooke, B.M.,  
541 Jones, D.G., Kaye, B. (eds.), *The Epidemiology of Plant Diseases*. Springer Netherlands.
- 542 **Gabriel, D., S.M. Sait, W.E. Kunin, and T.G. Benton. 2013.** Food production vs. biodiversity:  
543 comparing organic and conventional agriculture. *Journal of Applied Ecology* 50(2): 355–  
544 364. doi: 10.1111/1365-2664.12035.

- 545 **Goldringer, I., and T. Bataillon. 2004.** On the Distribution of Temporal Variations in Allele  
546 Frequency. *Genetics* 168(1): 563–568. doi: 10.1534/genetics.103.025908.
- 547 **Goudet, J. 2005.** hierfstat, a package for R to compute and test hierarchical F-statistics. *Molecular*  
548 *Ecology Notes* 5(1): 184–186. doi: 10.1111/j.1471-8286.2004.00828.x.
- 549 **Hartl, D.L., and A. Clark. 1997.** *Principles of Population Genetics*. Sinauer Associates, Inc,  
550 Sunderland, MA.
- 551 **Hedrick, P.W. 2005.** *Genetics of Populations*. Jones and Bartlett Publishers, Sudbury,  
552 Massachusetts.
- 553 **Heslop-Harrison, J.S., A.R. Leitch, T. Schwarzacher, and K. Anamthawat-Jonsson. 1990.**  
554 Detection and characterization of 1B/1R translocations in hexaploid wheat. *Heredity* 65(3):  
555 385–392.
- 556 **Jones, H., S. Clarke, Z. Haigh, H. Pearce, and M. Wolfe. 2010.** The Effect of the Year of Wheat  
557 Variety Release on Productivity and Stability of Performance on Two Organic and Two  
558 Non-Organic Farms. *The Journal of Agricultural Science* 148(03): 303–317. doi:  
559 10.1017/S0021859610000146.
- 560 **Kuznetsova, A., P.B. Brockhoff, and R.H.B. Christensen. 2017.** lmerTest: Tests in Linear Mixed  
561 Effects Models. *Journal of Statistical Software* 82(13): 1–26. doi: 10.18637/jss.v082.i13.
- 562 **Le Boulc’h, V., J.L. David, P. Brabant, and C. de Vallavieille-Pope. 1994.** Dynamic  
563 conservation of variability: responses of wheat populations to different selective forces  
564 including powdery mildew. *Genet Sel Evol* 26(S1): S221. doi: 10.1186/1297-9686-26-S1-  
565 S221.
- 566 **Lenth, R. 2018.** emmeans: Estimated Marginal Means, aka Least-Squares Means.
- 567 **Litrico, I., and C. Violle. 2015.** Diversity in Plant Breeding: A New Conceptual Framework.  
568 *Trends in Plant Science* 20(10): 604–613. doi: 10.1016/j.tplants.2015.07.007.
- 569 **Meirmans, P.G., and P.W. Hedrick. 2010.** Assessing population structure: FST and related  
570 measures. *Molecular Ecology Resources* 11(1): 5–18. doi: 10.1111/j.1755-  
571 0998.2010.02927.x.

- 572 **Mercer, K.L., and H.R. Perales. 2010.** Evolutionary response of landraces to climate change in  
573 centers of crop diversity. *Evolutionary Applications* 3(5–6): 480–493. doi: 10.1111/j.1752-  
574 4571.2010.00137.x.
- 575 **Nei, M. 1973.** Analysis of Gene Diversity in Subdivided Populations. *Proceedings of the National*  
576 *Academy of Sciences of the United States of America* 70(12): 3321–3323.
- 577 **Nei, M., and F. Tajima. 1981.** Genetic Drift and Estimation of Effective Population Size. *Genetics*  
578 98(3): 625–640.
- 579 **Paillard, S., I. Goldringer, J. Enjalbert, G. Doussinault, C. de Vallavieille-Pope, and P.**  
580 **Brabant. 2000.** Evolution of resistance against powdery mildew in winter wheat  
581 populations conducted under dynamic management. I-Is specific seedling resistance  
582 selected? *TAG Theoretical and Applied Genetics* 101(3): 449–456.
- 583 **R Core Team. 2018.** R: A Language and Environment for Statistical Computing. R Foundation for  
584 Statistical Computing, Vienna, Austria.
- 585 **Raggi, L., S. Ceccarelli, and V. Negri. 2016.** Evolution of a barley composite cross-derived  
586 population: an insight gained by molecular markers. *The Journal of Agricultural Science*  
587 154(01): 23–39. doi: 10.1017/S0021859614001269.
- 588 **Raquin, A.-L., P. Brabant, B. Rhoné, F. Balfourier, P. Leroy, and I. Goldringer. 2008.** Soft  
589 selective sweep near a gene that increases plant height in wheat. *Molecular Ecology* 17(3):  
590 741–756. doi: 10.1111/j.1365-294X.2007.03620.x.
- 591 **Rhoné, B., R. Vitalis, I. Goldringer, and I. Bonnin. 2010.** Evolution of flowering time in  
592 experimental wheat populations: a comprehensive approach to detect genetic signatures of  
593 natural selection. *Evolution* 64(7): 2110–2125. doi: 10.1111/j.1558-5646.2010.00970.x.
- 594 **Röder, M.S., V. Korzun, K. Wendehake, J. Plaschke, M.-H. Tixier, P. Leroy, and M.W.**  
595 **Ganal. 1998.** A Microsatellite Map of Wheat. *Genetics* 149(4): 2007–2023.
- 596 **Schneider, A., and M. Molnár-Láng. 2009.** Detection of the 1RS chromosome arm in  
597 Martonvásár wheat genotypes containing 1B1.1Rs or 1A1.1Rs translocations using SSR and  
598 STS markers. *Acta Agronomica Hungarica* 57(4): 409–416. doi: 10.1556/AAgr.57.2009.4.3.

- 599 **Somers, D.J., P. Isaac, and K. Edwards. 2004.** A high-density microsatellite consensus map for  
600 bread wheat (*Triticum aestivum* L.). *Theoretical and Applied Genetics* 109: 1105–1114. doi:  
601 10.1007/s00122-004-1740-7.
- 602 **Stephenson, P., G. Bryan, J. Kirby, A. Collins, K. Devos, C. Busso, and M. Gale. 1998.** Fifty  
603 new microsatellite loci for the wheat genetic map. *TAG Theoretical and Applied Genetics*  
604 97: 946–949. doi: 10.1007/s001220050975.
- 605 **Suneson, C.A. 1956.** An Evolutionary Plant Breeding Method. *Agron J* 48(4): 188–191.
- 606 **Thépot, S., G. Restoux, I. Goldringer, F. Hospital, D. Gouache, I. Mackay, and J. Enjalbert.**  
607 **2015.** Efficiently Tracking Selection in a Multiparental Population: The Case of Earliness in  
608 Wheat. *Genetics* 199(2): 609–623. doi: 10.1534/genetics.114.169995.
- 609 **Waples, R.S. 1989.** A Generalized Approach for Estimating Effective Population Size From  
610 Temporal Changes in Allele Frequency. *Genetics* 121(2): 379–391.
- 611 **Weiner, J. 2003.** Ecology—the science of agriculture in the 21st century. *The Journal of*  
612 *Agricultural Science* 141(3–4): 371–377.
- 613 **Weiner, J., S.B. Andersen, W.K.-M. Wille, H.W. Griepentrog, and J.M. Olsen. 2010.**  
614 Evolutionary Agroecology: the potential for cooperative, high density, weed-suppressing  
615 cereals. *Evolutionary Applications* 3(5–6): 473–479. doi: 10.1111/j.1752-  
616 4571.2010.00144.x.
- 617 **Weiner, J., and R.P. Freckleton. 2010.** Constant Final Yield. *Annual Review of Ecology,*  
618 *Evolution, and Systematics* 41(1): 173–192. doi: 10.1146/annurev-ecolsys-102209-144642.
- 619 **Weir, B., and C. Cockerham. 1984.** Estimating F-statistics for the analysis of population structure.  
620 *Evolution* 38(6): 1358–1370. doi: 10.2307/2408641.
- 621 **Wright, S. 1969.** *Evolution and the Genetics of Populations: Volume 2, The Theory of Gene*  
622 *Frequencies.* University of Chicago Press, Chicago.
- 623 **Wright, S. 1978.** *Evolution and the Genetics of Population, Variability Within and Among Natural*  
624 *Populations.* University of Chicago Press, Chicago.

625 **Zanke, C.D., J. Ling, J. Plieske, S. Kollers, E. Ebmeyer, V. Korzun, O. Argillier, G. Stiewe, M.**  
626 **Hinze, K. Neumann, M.W. Ganal, and M.S. Röder. 2014.** Whole Genome Association  
627 Mapping of Plant Height in Winter Wheat (*Triticum aestivum* L.) (P Hernandez, Ed.). PLoS  
628 ONE 9(11): e113287. doi: 10.1371/journal.pone.0113287.

629 **Zeller, F.J., E.R. Sears, and L.M.S. Sears. 1973.** 1B/1R wheat-rye chromosome substitutions and  
630 translocations. p. 209–221. *In* Proceedings of the fourth international wheat genetics  
631 symposium. Alien genetic material. University of Missouri.

632

633 Fig. 1 Schematic overview of the crossing scheme of the bread wheat CCP and of the sampled  
634 populations (bold fonts). The number of sampled individuals (n) and the sets of markers that were  
635 analyzed are shown below each population.

636

637 Fig. 2: Change of Nei's gene diversity ( $H_e$ ) over generations of bread wheat CCP for SNP and SSR  
638 marker sets at the four different locations Metfield (MET), Morley (MOR), Sheepdrove Organic  
639 Farm (SOF) and Wakelyns Agroforestry (WAF). FND indicates the founding population. Error bars  
640 are 95% CIs from bootstrapping over loci.

641

642 Fig. 3: Change of allele frequency in the bread wheat CCP starting from the estimated allele  
643 frequency of the virtual founding population (FND). The allele frequency is shown for the frequent  
644 allele in the FND population. The different colors denote the allele frequencies in the populations at  
645 the different locations (black: MET, red: MOR, green: SOF, blue: WAF). The dashed and dotted  
646 lines indicate the 95% CI of the allele frequency expected under pure genetic drift given an  $N_e =$   
647 150 and  $N_e = 250$ , respectively. For the SNP marker loci (top two rows), the function of the frequent  
648 allele is given.

649 Fig. 4: Relationship between the additive allele effect on plant height (left) and (b) on heading date  
650 (right) and the temporal change in allele frequency from the founding bread wheat CCP population  
651 (FND) to the allele frequency at generation 10 (averaged over all four locations). For plant height,  
652 the significant correlation indicates, that those genes with a stronger effect on plant height (such as  
653 *Rht-D1*) tended to have a more pronounced selection over time, demonstrated by the high change in  
654 allele frequency.

655

656

657

658

659

660

Fig. 4

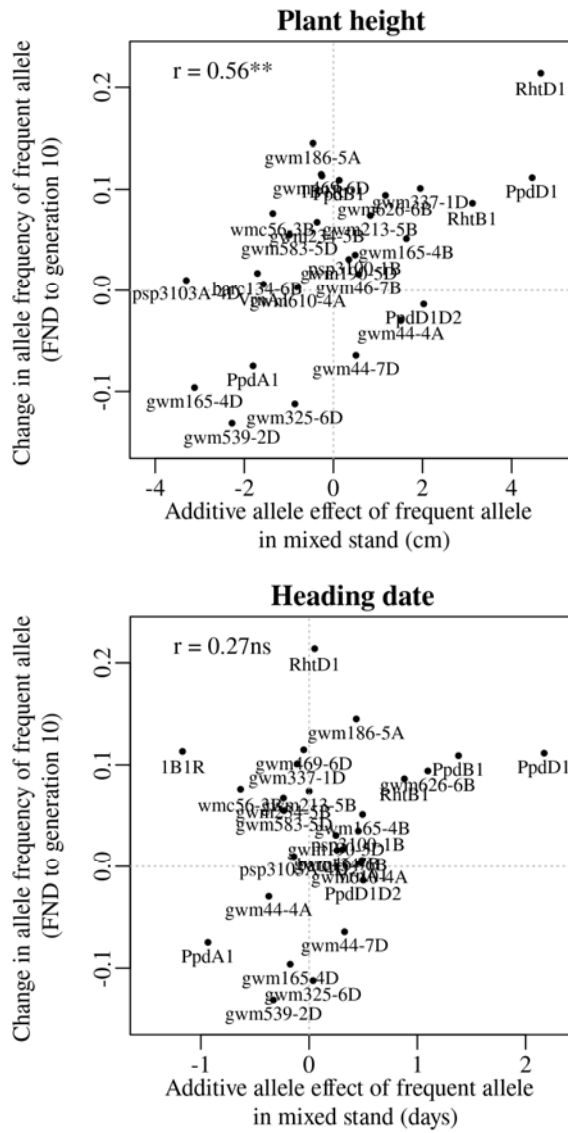



Fig. 1

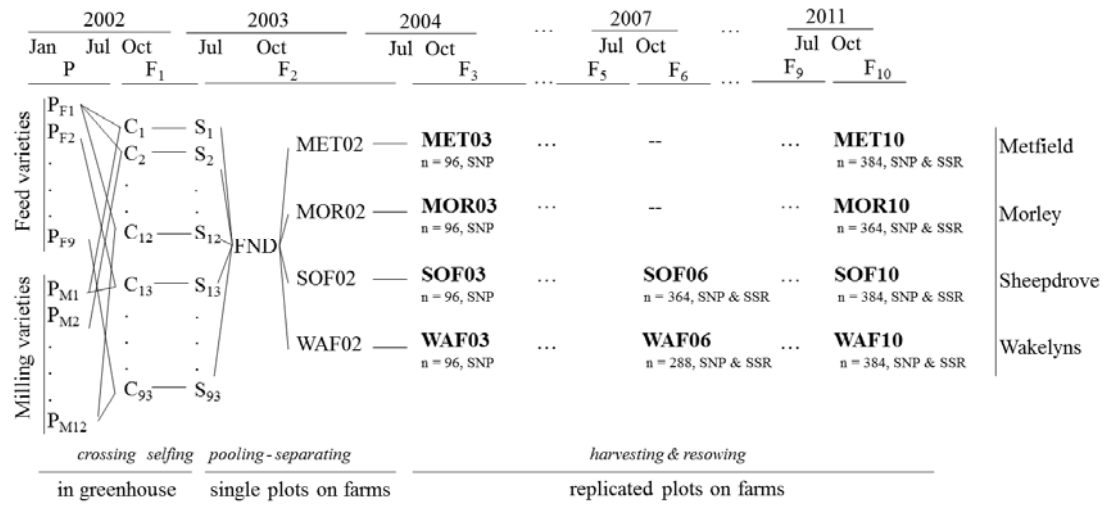

Fig. 2

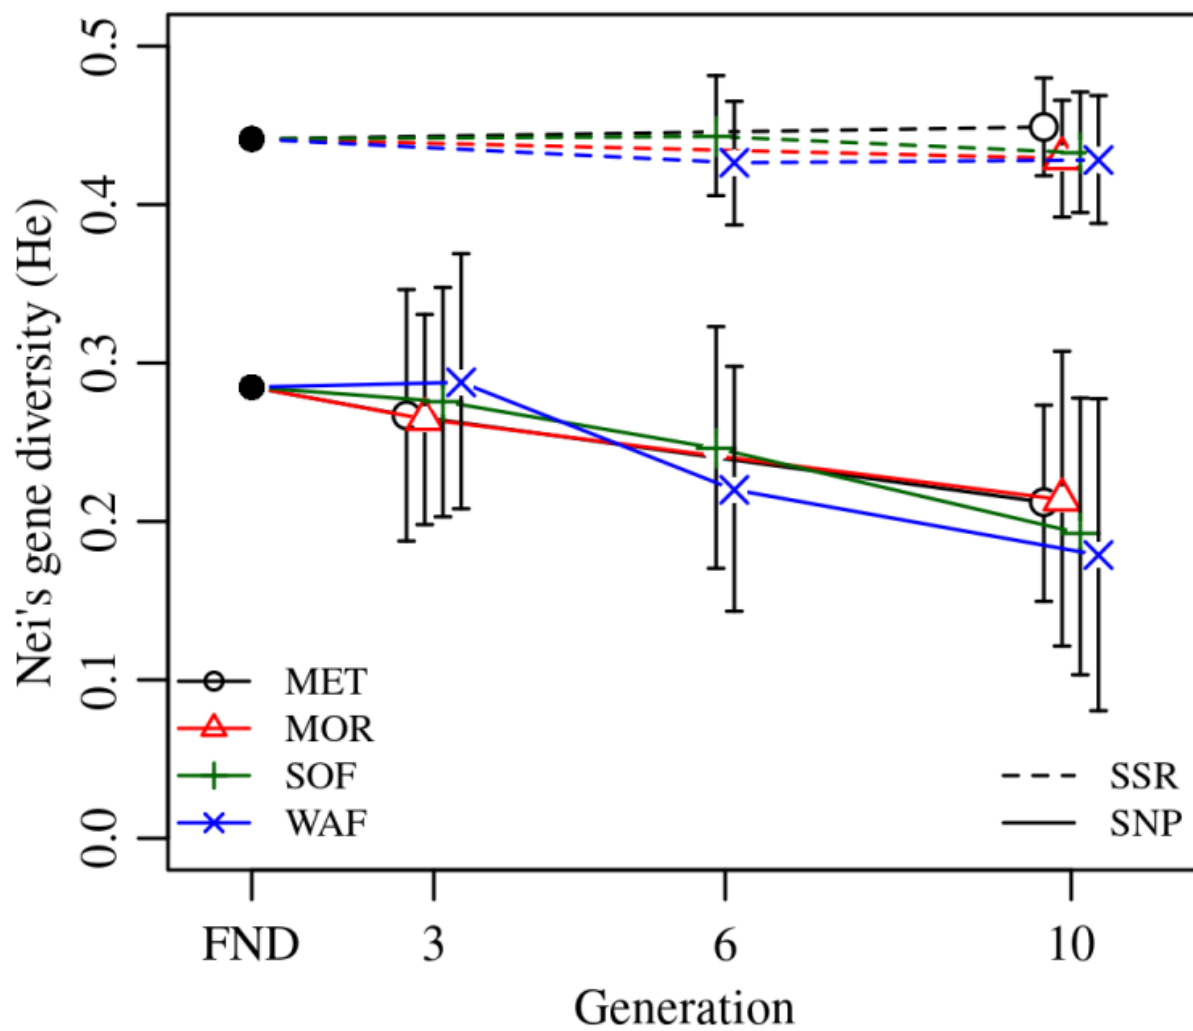

Fig. 3

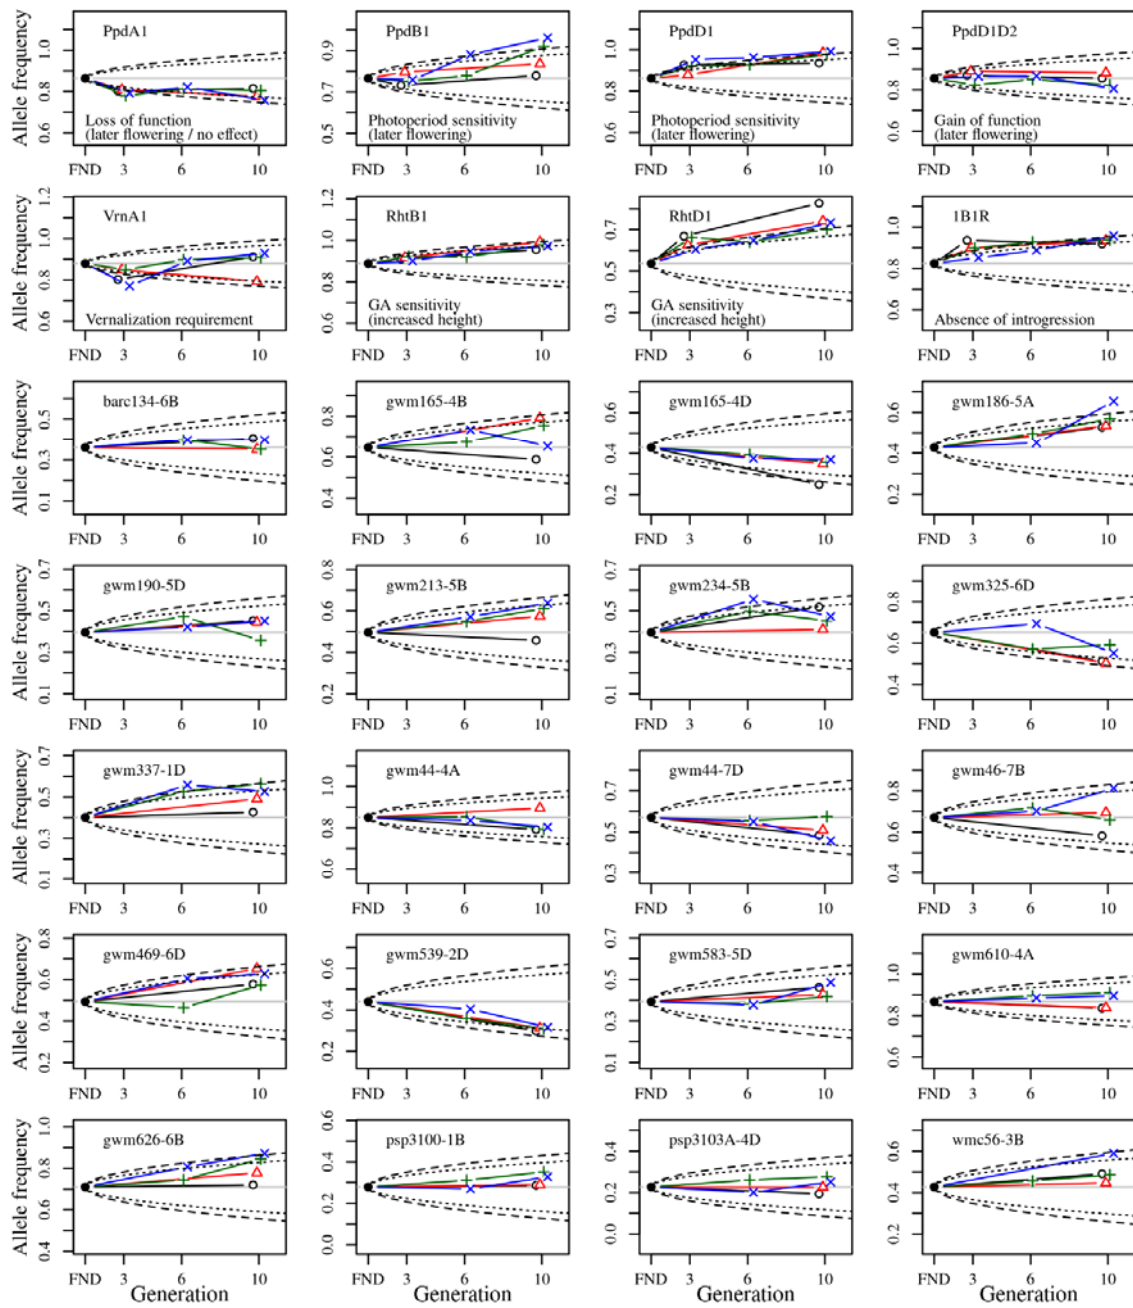

Source: https://www.biorxiv.org/content/10.1101/678938v1.full.pdf
